# Supplementary material
Source: publisher site journal article supplement (https://www.dovepress.com/article/297032)
Supplement: Supplementary file 1 [file get_supplementary_file.php]

Study Participant ID#

|  |  |  |  |
|--|--|--|--|
|  |  |  |  |
|--|--|--|--|

**Questionnaire for patients or caregivers:**

Study Title: Cost of Traumatic Brain Injury (TBI) in Motorcycle Crash Victims at a Public Tertiary Healthcare Facility in Karachi, Pakistan: An Analytical Cross-sectional Study.

|                                 |  |
|---------------------------------|--|
| Date of Birth of the respondent |  |
| Date of data collection         |  |
| Respondent Contact Number       |  |
| Data Collector Name with Code#  |  |
| Supervisor's Name               |  |
| Edited by                       |  |
| Entered by                      |  |

**Part-a Demographic Variables**

| No. | Questions and Filters                                                 | Coding Categories                                                                                                                                                                                                                                                                                                                                                       | Skip              | Answers |
|-----|-----------------------------------------------------------------------|-------------------------------------------------------------------------------------------------------------------------------------------------------------------------------------------------------------------------------------------------------------------------------------------------------------------------------------------------------------------------|-------------------|---------|
| Q1  | What is the Gender of the patient?<br>Circle one best answer          | 1. Male<br>2. Female                                                                                                                                                                                                                                                                                                                                                    |                   |         |
| Q2  | What is patient's level of education?<br>Circle one best answer       | 1. No formal Education<br>2. Less than Primary School<br>3. Primary School<br>4. High School<br>5. College Diploma<br>6. Degree<br>7. Post Graduate and higher.<br>8. Madrasa education                                                                                                                                                                                 |                   |         |
| Q3  | What is patient's marital status?<br>Circle one best answer           | 1. Single<br>2. Married<br>3. Widowed<br>4. Divorced<br>5. Separated                                                                                                                                                                                                                                                                                                    |                   |         |
| Q4  | Is the patient a resident of Karachi city?<br>Circle one best answer  | 1. Yes<br>2. No                                                                                                                                                                                                                                                                                                                                                         | If No, skip to Q5 |         |
| Q4a | Where is the patient living in Karachi?<br><br>Circle one best answer | 1. Baldia Town<br>2. Bin Qasim Town<br>3. Gadap Town<br>4. Gulberg Town<br>5. Gulshan Town<br>6. Jamshed Town<br>7. Kemari Town<br>8. Korangi Town<br>9. Landhi Town<br>10. Liaquatabad Town<br>11. Lyari Town<br>12. Malir Town<br>13. New Karachi Town<br>14. North Nazimabad Town<br>15. Orangi Town<br>16. Saddar Town<br>17. Shah Faisal Town<br>18. S.I.T.E. Town |                   |         |
| Q5  | How many members are there in patient's family?                       | Write exact number of family members in two digits number                                                                                                                                                                                                                                                                                                               |                   |         |

|      |                                                                                                              |                                                                                                                                                                                                                                                                                                                                               |                  |  |
|------|--------------------------------------------------------------------------------------------------------------|-----------------------------------------------------------------------------------------------------------------------------------------------------------------------------------------------------------------------------------------------------------------------------------------------------------------------------------------------|------------------|--|
| Q6   | What is patient's role in the family in terms of earning?<br>Circle one best answer                          | 1. The only Breadwinner<br>2. Dependent<br>3. Partially supportive                                                                                                                                                                                                                                                                            |                  |  |
| Q7   | What is the average monthly household income in patient's family?<br>Circle one best answer                  | 1. <10000 PKR<br>2. 10000-20000 PKR<br>3. 20000-30000 PKR<br>4. 30000-40000 PKR<br>5. 50000 and above                                                                                                                                                                                                                                         |                  |  |
| Q8   | How much is patient's earning share in the total household income?<br>Circle one best answer                 | 1. 5000-10000 PKR<br>2. 10000-15000 PKR<br>3. 15000-20000 PKR<br>4. 20000-25000 PKR<br>5. 30000 and above                                                                                                                                                                                                                                     |                  |  |
| Q9   | Is the patient currently employed?<br>Circle one best answer                                                 | 1. Yes<br>2. No                                                                                                                                                                                                                                                                                                                               | If No go to Q10  |  |
| Q9a  | If yes, what is patient's actual occupation?<br>Circle one best answer                                       | 1. Manager<br>2. Professional<br>3. Technician or associate professional<br>4. Clerical support worker<br>5. Service and sales worker<br>6. Skilled agricultural, forestry or fishery<br>7. Craft and related trades worker<br>8. Plant or machine operator<br>9. Elementary occupation<br>10. Armed forces occupation<br>11. Others, specify |                  |  |
| Q10  | Who was driving the motorcycle at the time of accident?<br>Circle one best answer                            | 1. The respondent<br>2. Accompanying person<br>3. Others                                                                                                                                                                                                                                                                                      |                  |  |
| Q11  | How many people were there on the motorcycle at the time of accident?<br>Circle one best answer              | 1. 1 Person<br>2. 2 Persons<br>3. 3 Persons<br>4. 4 or more than 4 persons                                                                                                                                                                                                                                                                    |                  |  |
| Q12  | Were there any children under age of 18 years old with the patient on the motorbike at the time of accident? | 1. Yes<br>2. No                                                                                                                                                                                                                                                                                                                               | If No, go to Q13 |  |
| Q12a | If yes, how many children were there with you?<br>Circle one best answer                                     | 1. 1 child<br>2. 2 children<br>3. 3 children<br>4. 4 and above children                                                                                                                                                                                                                                                                       |                  |  |
| Q12b | Please mention children's ages in years.                                                                     | 1. Child #1 age .....<br>2. Child #2 age .....<br>3. Child #3 age .....<br>4. Child #4 age .....                                                                                                                                                                                                                                              |                  |  |
| Q13  | Was the patient wearing helmet at the time accident?<br>Circle one best answer                               | 1. Yes, with proper fixation of chin strap<br>2. Yes, without proper fixation of chin strap<br>3. No<br>4. Not known (Cannot be identified)                                                                                                                                                                                                   |                  |  |
| Q14  | With what the motorcycle collided?<br>With ..... Circle one best answer                                      | 1. Motor Vehicle<br>2. Motorcycle<br>3. Rickshaw<br>4. Pedestrian<br>5. Lone motorcycle (Falling off the bike)                                                                                                                                                                                                                                |                  |  |

|      |                                                                                                                                       |                                                                                                                                                                                                                                                                                                                                                                                                                                                                             |                   |  |
|------|---------------------------------------------------------------------------------------------------------------------------------------|-----------------------------------------------------------------------------------------------------------------------------------------------------------------------------------------------------------------------------------------------------------------------------------------------------------------------------------------------------------------------------------------------------------------------------------------------------------------------------|-------------------|--|
|      |                                                                                                                                       | <ul style="list-style-type: none"> <li>6. Animal</li> <li>7. Fixed object</li> <li>8. Others, specify</li> </ul>                                                                                                                                                                                                                                                                                                                                                            |                   |  |
| Q15  | <p>How did the accident happen?<br/>Circle one best answer</p>                                                                        | <ul style="list-style-type: none"> <li>1. Head-On Collisions ( another vehicle hit from front)</li> <li>2. Another vehicle hit while changing lane</li> <li>3. Hit by car from back</li> <li>4. High Speeding</li> <li>5. Road hazards</li> <li>6. Motorcycle defect</li> <li>7. Driver was using cellphone</li> <li>8. Weather problems</li> <li>9. Driver has Eye sight or hearing impairment</li> <li>10. Cloth got stuck in motorbike</li> <li>11. Not known</li> </ul> |                   |  |
| Q16  | <p>What is the type of road location where the accident occurred?<br/>Circle one best answer</p>                                      | <ul style="list-style-type: none"> <li>1. Intersection</li> <li>2. Mid-block</li> <li>3. U Turn</li> <li>4. Flyover / bridge</li> <li>5. Plain road</li> <li>6. Off-road</li> <li>7. Not Known</li> </ul>                                                                                                                                                                                                                                                                   |                   |  |
| Q17  | <p>From where or which location the patient is brought to the JPMC ER?</p>                                                            | <ul style="list-style-type: none"> <li>1. Directly from the crash site</li> <li>2. Referred from other healthcare facility</li> <li>3. Follow up visit</li> <li>4. Not Known</li> </ul>                                                                                                                                                                                                                                                                                     | If 1, skip to Q18 |  |
| Q17a | <p>Which medical and surgical services are provided to the patient before referring to JPMC ER?<br/>Circle as many as applicable.</p> | <ul style="list-style-type: none"> <li>1. First aid</li> <li>2. Pain medication</li> <li>3. IV fluid resuscitation</li> <li>4. Blood Transfusion</li> <li>5. Minor surgeries</li> <li>6. Wound Dressing</li> <li>7. Others, Specify</li> </ul>                                                                                                                                                                                                                              |                   |  |
| Q18  | <p>How long it took the patient to arrive at the JPMC ER after the accident happened?<br/>Circle one best answer</p>                  | <ul style="list-style-type: none"> <li>1. 0-10 minutes</li> <li>2. 11-20 minutes</li> <li>3. 21-30 minutes</li> <li>4. 31-59 minutes</li> <li>5. 60 minutes and above</li> </ul>                                                                                                                                                                                                                                                                                            |                   |  |
| Q19  | <p>What was patient's estimated speed at the time of accident (km/hour)?<br/>Circle one best answer</p>                               | <ul style="list-style-type: none"> <li>1. &lt;30</li> <li>2. 30-50</li> <li>3. 50-69</li> <li>4. 70-80</li> <li>5. &gt;80</li> <li>6. Not known</li> </ul>                                                                                                                                                                                                                                                                                                                  |                   |  |
| Q20  | <p>What parts of the body are injured?<br/>Circle as many as applicable.</p>                                                          | <ul style="list-style-type: none"> <li>1. Head/Skull</li> <li>2. Maxillofacial</li> <li>3. Neck injury</li> <li>4. Chest</li> <li>5. Abdomen and internal viscera</li> <li>6. Spine</li> <li>7. Upper limb</li> <li>8. Lower limb</li> <li>9. Others, specify</li> </ul>                                                                                                                                                                                                    |                   |  |

|                                                             |                                                                                                                                                                                                                                         |                                                                                                                                                                                                                                  |                    |  |
|-------------------------------------------------------------|-----------------------------------------------------------------------------------------------------------------------------------------------------------------------------------------------------------------------------------------|----------------------------------------------------------------------------------------------------------------------------------------------------------------------------------------------------------------------------------|--------------------|--|
| Q21                                                         | What are the details of head injuries?<br><br>Circle as many as applicable. (to be extracted from patient's file)                                                                                                                       | 1. Extradural haematoma<br>2. Acute subdural haematoma<br>3. Subarachnoid haematoma<br>4. Intracerebral haemorage<br>5. Concussion injury<br>6. Cerebral contusion<br>7. Diffuse axonal injury<br>8. Skull Fracture<br>9. others |                    |  |
| <b>Part-b Out-of-Pocket (OOP) Healthcare Expenses</b>       |                                                                                                                                                                                                                                         |                                                                                                                                                                                                                                  |                    |  |
| This part should be filled at the end of hospital discharge |                                                                                                                                                                                                                                         |                                                                                                                                                                                                                                  |                    |  |
| Q22                                                         | Did the patient receive all the laboratory services free of cost from the hospital?                                                                                                                                                     | 1. Yes<br>2. No<br>3. Not needed                                                                                                                                                                                                 | If 1, skip to Q23  |  |
| Q22a                                                        | List of Laboratory Test investigated outside: _____<br>Paid: Yes <input type="checkbox"/> No <input type="checkbox"/><br>Amount if paid _____ PKR<br>Data retrieved by: Recall <input type="checkbox"/> Record <input type="checkbox"/> |                                                                                                                                                                                                                                  |                    |  |
| Q23                                                         | Did the patient receive radiology services free of cost from the hospital?                                                                                                                                                              | 1. Yes<br>2. No<br>3. Not ordered                                                                                                                                                                                                | If 1, skip to Q24  |  |
| Q23a                                                        | Radiology Test investigated: _____<br>Paid: Yes <input type="checkbox"/> No <input type="checkbox"/><br>Amount if paid _____ PKR<br>Data retrieved by: Recall <input type="checkbox"/> Record <input type="checkbox"/>                  |                                                                                                                                                                                                                                  |                    |  |
| Q24                                                         | Did the patient receive all medicines free of cost from the hospital?                                                                                                                                                                   | 1. Yes<br>2. No                                                                                                                                                                                                                  | If 1, skip to Q25  |  |
| Q24a                                                        | List of Medicines _____<br>Paid: Yes <input type="checkbox"/> No <input type="checkbox"/><br>Amount if paid _____ PKR<br>Data retrieved by: Recall <input type="checkbox"/> Record <input type="checkbox"/>                             |                                                                                                                                                                                                                                  |                    |  |
| Q25                                                         | Did the patient use any formula feed diet during hospital stay?                                                                                                                                                                         | 1. Yes<br>2. No                                                                                                                                                                                                                  | If No, skip to Q26 |  |
| Q25a                                                        | Which formula feed and dietary product you used during hospital stay?<br>Circle as applicable and write down the quantity in two digit numbers                                                                                          | 1. Ensure<br>2. Isocal<br>3. Glucerna<br>4. Blenderized Tube Feeding<br>5. Others, specify                                                                                                                                       |                    |  |
| Q25b                                                        | Did you receive the feed diet from hospital free of cost?                                                                                                                                                                               | 1. Yes<br>2. No                                                                                                                                                                                                                  | If No, answer Q25c |  |

|                                                                                                           |                                                                                                                                                                                                                |                                                                                                                                                                                                                                                                                                                                                                 |                    |  |
|-----------------------------------------------------------------------------------------------------------|----------------------------------------------------------------------------------------------------------------------------------------------------------------------------------------------------------------|-----------------------------------------------------------------------------------------------------------------------------------------------------------------------------------------------------------------------------------------------------------------------------------------------------------------------------------------------------------------|--------------------|--|
| Q25c                                                                                                      | List of Formula Feed _____<br>Paid: Yes <input type="checkbox"/> No <input type="checkbox"/><br>Amount if paid _____ PKR<br>Data retrieved by: Recall <input type="checkbox"/> Record <input type="checkbox"/> |                                                                                                                                                                                                                                                                                                                                                                 |                    |  |
| Q26                                                                                                       | Does the patient have any health insurance?                                                                                                                                                                    | 1. Yes<br>2. No                                                                                                                                                                                                                                                                                                                                                 | If No, skip to Q30 |  |
| Q26a                                                                                                      | If yes, specify kind of health insurance                                                                                                                                                                       | 1. Employment based health insurance<br>2. Private health insurance<br>3. Community based Insurance<br>5. Others, specify                                                                                                                                                                                                                                       |                    |  |
| Q26b                                                                                                      | What medical expenses are covered in patient's health insurance and how much the maximum limit (cap)?                                                                                                          | 1. In-patient _____ PKR<br>2. Out-patient _____ PKR<br>3. Travel cost _____ PKR<br>4. Others, specify _____ PKR                                                                                                                                                                                                                                                 |                    |  |
| Q27                                                                                                       | What is the average total expenses of the caregivers (family members) for food, travel and others?                                                                                                             | Write exact amount in PKR                                                                                                                                                                                                                                                                                                                                       |                    |  |
| Q28                                                                                                       | What coping mechanism the patient used to manage the cost of healthcare during hospital stay?                                                                                                                  | 1. Borrowed money from friends and relatives<br>2. Took bank loan<br>3. Used savings<br>4. Sold assets<br>5. Deferred other payments<br>6. Others, specify                                                                                                                                                                                                      |                    |  |
| <b>Part-c Healthcare Services Provided to the Patient</b>                                                 |                                                                                                                                                                                                                |                                                                                                                                                                                                                                                                                                                                                                 |                    |  |
| Fill this data from patient's healthcare providers (Physicians or Nurses) and by reviewing patient's file |                                                                                                                                                                                                                |                                                                                                                                                                                                                                                                                                                                                                 |                    |  |
| Q29                                                                                                       | Which initial triage and resuscitation services are provided in the emergency department?<br><br>Circle as many as applicable.                                                                                 | 1. History and physical examination<br>2. Vital Signs checked<br>3. Trauma Protocol initiated<br>4. IV cannula insertion<br>5. IV Fluid Resuscitation<br>6. IV Mannitol administration<br>7. CPR<br>8. ETT inserted (advance airway maintenance)<br>9. Wound Dressing<br>10. Pain management<br>11. TT vaccine administered<br>12. Other interventions, specify |                    |  |

|                                      |                                                                     |                                                                                                                                                                                                                                                                                         |                                                            |  |
|--------------------------------------|---------------------------------------------------------------------|-----------------------------------------------------------------------------------------------------------------------------------------------------------------------------------------------------------------------------------------------------------------------------------------|------------------------------------------------------------|--|
| Q30                                  | <b>Data of Medical Surgical Interventions in ER:</b>                |                                                                                                                                                                                                                                                                                         |                                                            |  |
| Date of admission: _____ time: _____ |                                                                     |                                                                                                                                                                                                                                                                                         |                                                            |  |
| Laboratory Investigations: _____     |                                                                     |                                                                                                                                                                                                                                                                                         |                                                            |  |
| Radiological Investigations: _____   |                                                                     |                                                                                                                                                                                                                                                                                         |                                                            |  |
| Medications: _____                   |                                                                     |                                                                                                                                                                                                                                                                                         |                                                            |  |
| Surgical Procedures: _____           |                                                                     |                                                                                                                                                                                                                                                                                         |                                                            |  |
| Nursing Procedures: _____            |                                                                     |                                                                                                                                                                                                                                                                                         |                                                            |  |
| Duration of Stay in ER: _____        |                                                                     |                                                                                                                                                                                                                                                                                         |                                                            |  |
| Q31                                  | Next destination of the patient from ER.                            | <ol style="list-style-type: none"> <li>1. Admitted in general ward</li> <li>2. Admitted in ICU or other special care unit</li> <li>3. Taken to Operation Theater</li> <li>4. LAMA</li> <li>5. Referred to other hospitals</li> <li>6. Discharged</li> <li>7. others, specify</li> </ol> | If LAMA or referred to other hospitals, exclude from study |  |
| Q32                                  | <b>Data of Medical Surgical Interventions in General Ward:</b>      |                                                                                                                                                                                                                                                                                         |                                                            |  |
| Date of admission: _____ time: _____ |                                                                     |                                                                                                                                                                                                                                                                                         |                                                            |  |
| Laboratory Investigations: _____     |                                                                     |                                                                                                                                                                                                                                                                                         |                                                            |  |
| Radiological Investigations: _____   |                                                                     |                                                                                                                                                                                                                                                                                         |                                                            |  |
| Medications: _____                   |                                                                     |                                                                                                                                                                                                                                                                                         |                                                            |  |
| Surgical Procedures: _____           |                                                                     |                                                                                                                                                                                                                                                                                         |                                                            |  |
| Nursing Procedures: _____            |                                                                     |                                                                                                                                                                                                                                                                                         |                                                            |  |
| Duration of Stay: _____              |                                                                     |                                                                                                                                                                                                                                                                                         |                                                            |  |
| Q33                                  | <b>Data of Medical Surgical Interventions in Operation Theater:</b> |                                                                                                                                                                                                                                                                                         |                                                            |  |
| Date of admission: _____ time: _____ |                                                                     |                                                                                                                                                                                                                                                                                         |                                                            |  |
| Laboratory Investigations: _____     |                                                                     |                                                                                                                                                                                                                                                                                         |                                                            |  |
| Radiological Investigations: _____   |                                                                     |                                                                                                                                                                                                                                                                                         |                                                            |  |
| Medications: _____                   |                                                                     |                                                                                                                                                                                                                                                                                         |                                                            |  |
| Surgical Procedures: _____           |                                                                     |                                                                                                                                                                                                                                                                                         |                                                            |  |
| Nursing Procedures: _____            |                                                                     |                                                                                                                                                                                                                                                                                         |                                                            |  |
| Duration of Stay: _____              |                                                                     |                                                                                                                                                                                                                                                                                         |                                                            |  |

Q34

**Data of Medical Surgical Interventions in ICU or other Special Care Units:**

Date of admission: \_\_\_\_\_ time: \_\_\_\_\_

Laboratory Investigations: \_\_\_\_\_

Radiological Investigations: \_\_\_\_\_

Medications: \_\_\_\_\_

Surgical Procedures: \_\_\_\_\_

Nursing Procedures: \_\_\_\_\_

Duration of Stay: \_\_\_\_\_
